# Supplementary material for: New Global Characterization of Landslide Exposure
Source: Copernicus journal article supplement (doi:10.5194/nhess-2019-434), 2020-01-22
Supplement: Supplementary file 1 [file Supplementary_figures.pdf › Supplementary_figures.pdf]

## New Global Characterization of Landslide Exposure - Supplementary Figures

Robert Emberson<sup>1</sup>, Dalia Kirschbaum<sup>1</sup>, Thomas Stanley<sup>2</sup>

<sup>1</sup> Hydrological Sciences Laboratory, NASA Goddard Space Flight Center, 8800 Greenbelt Road, Greenbelt, Maryland 20771 USA

<sup>2</sup> Universities Space Research Association/GESTAR, 7178 Columbia Gateway Dr, Columbia, Maryland 21046 USA

*Correspondence to:* Robert Emberson (robert.a.emberson@nasa.gov)

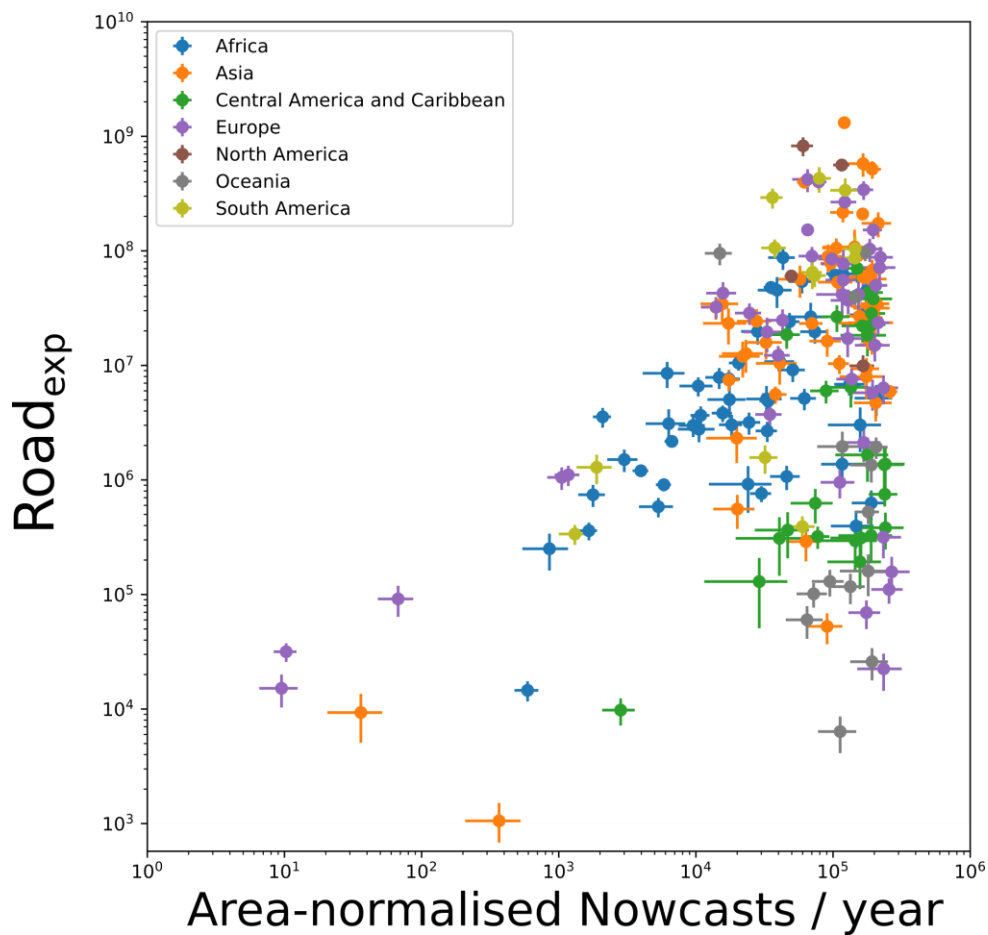

Supplementary Figure 1: for each country in the dataset, this figure shows the exposure of roads ( $\text{Road}_{\text{exp}}$ ) compared with the number of nowcasts in that country, divided by the area of the country. There is a general increase in exposure as Nowcasts increase, although in many countries in Europe and Central America and the Caribbean, exposure of roads remains lower despite increased landslide hazard, indicating the roads do not intersect the highest hazard areas.

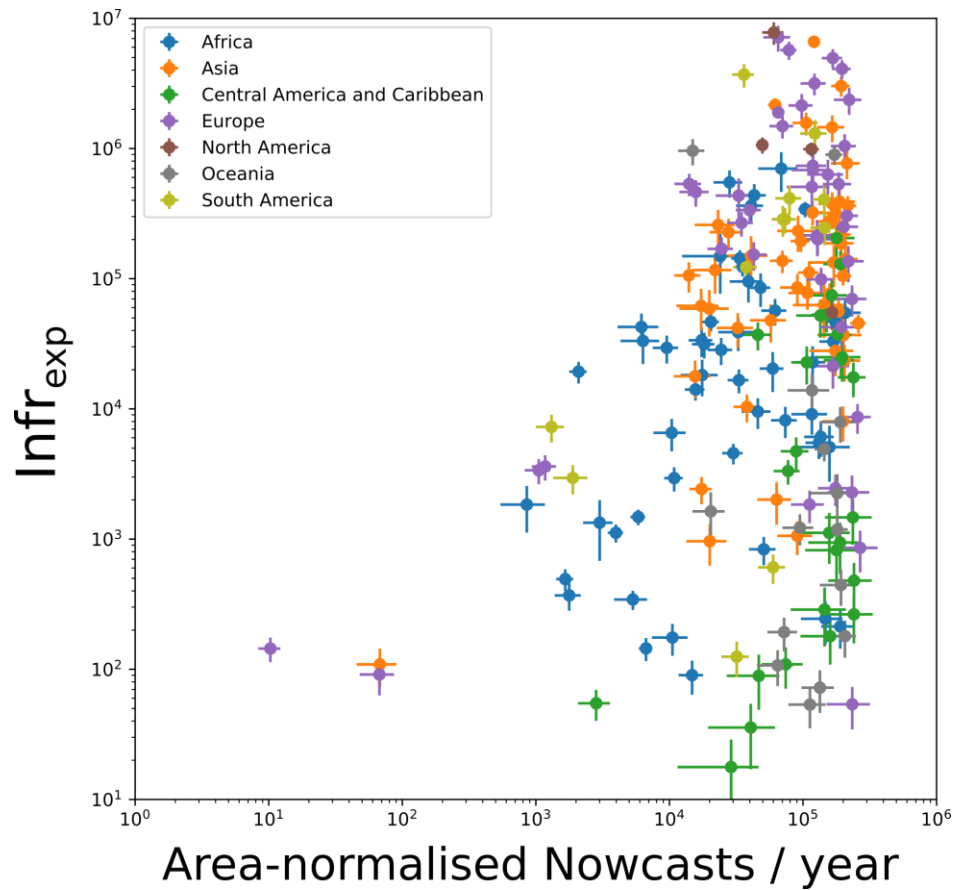

Supplementary Figure 2: Exposure of critical infrastructure ( $\text{Infr}_{\text{exp}}$ ) to landslide hazard, as defined by the sum of nowcasts divided by the area of the country. A similar relationship between these two variables is seen as for  $\text{Road}_{\text{exp}}$ , indicating that again higher hazard generally leads to higher exposure. However, this relationship is not particularly strong, which could reflect many countries placing critical infrastructure further from landslide hazard or lower consistency in mapping of critical infrastructure in those zones. See main text for discussion.
