# Supplementary material for: New Global Characterization of Landslide Exposure
Source: Copernicus journal article supplement (doi:10.5194/nhess-2019-434), 2020-01-22
Supplement: Supplementary file 1 [file SUPPLEMENTARY_TABLE_1.xls]

## Sheet: Sheet1
This Data Table accompanies Emberson et al. (in review for NHESS). It contains the country-by-country data on population, roads and infrastructure, as discussed in the main text.
The data includes the annual mean and standard deviation for Nowcasts (see main text) which are the unit for landslide hazard.
The Nowcasts are used to estimate the exposure of each of the elements mentioned above to landslide hazard.
Additionally, some accompanying data is included: 2018 GDP and population from the World Bank, Fatalities due to rainfall induced landslides from Froude and Petley, 2018, OpenStreetMap completeness from Barrington-Leigh and Millard-Ball 2018, and sum of GDP deciles for landslide economic loss from Dilley et al. 2005
Country	Continent	Sum of road density derived from GRIP roads dataset (sum of km / km2)	Hospitals, Fuel Stations, Schools	OSM Power Nodes	Estimated OSM completeness fraction: Barrington-Leigh and Millard-Ball 2018 (fraction)	Nowcasts per year: average	Nowcasts per year: standard deviation	Mean annual exposure of fuel stations	Standard deviation of annual fuel station exposure	Mean of annual hospital exposure	Standard deviation of annual hospital exposure	Mean of annual population exposure	Standard deviation of annual population exposure	Mean of annual power node exposure	Standard deviation of annual power node exposure	Mean of annual road exposure	Standard deviation of annual road exposure	Mean of annual school exposure	Standard deviation of annual school exposure	Critical Infrastructure (no power nodes): annual mean	Critical Infrastructure (no power nodes): standard deviation	Critical Infrastructure including power nodes: mean	Critical Infrastructure including power nodes: standard deviation	Fatalities: Froude & Petley 2018	Area, square decimal degrees	2018 GDP per capita (USD): World Bank, 2019	2018 Population: World Bank, 2019	Sum of GDP deciles from Dilley et al. 2005 in each country
Zimbabwe	Africa	3153622	1855	14026	0.678412	586669	181097	370.421	105.232	177.526	50.0182	2.76633e+07	8.86663e+06	17092.2	5373.16	5.03334e+06	1.57342e+06	547.632	163.304	1095.58	318.554	18187.7	5691.71	2	33.3894	2147	14439018
Zambia	Africa	3.72523e+06	17133	41933	0.718235	600628	129530	335.158	92.7705	18.1579	5.71803	1.13891e+07	2.48622e+06	28569.4	6873.41	2.99057e+06	620127	510.105	145.515	863.421	244.003	29432.8	7117.42	22	62.8869	1539.9	17351822
Yemen	Asia	3852910	6712	2986	0.73221	4.12447e+06	1.15499e+06	5828.37	1681.99	44908.2	10758.7	3.73044e+08	8.94746e+07	22040.9	6221.08	53303726	1.26616e+07	4886.63	1341.8	55623.2	13782.5	77664.1	20003.6	122	38.2043	944.408	28498687
Vietnam	Asia	17095308	31536	27174	0.474667	4.58264e+06	422772	16944.1	1707.61	691.737	64.2027	5.1737e+08	5.35267e+07	251990	29407.1	2.0983e+08	2.11849e+07	2507.68	296.873	20143.5	2068.69	272134	31475.8	684	27.8569	2563.82	95540395	1459
Venezuela	South America	10705176	12177	28458	0.68254	5.2702e+06	912859	14450.5	4670.24	5628.21	1741.81	3.5591e+08	1.03862e+08	245334	63166.4	6.48636e+07	1.83885e+07	20645.8	6603.22	40724.5	13015.3	286058	76181.6	66	74.5943		28870195	6409
Vatican	Europe	1017.04	32		1	17.9474	6.42455	17.9474	6.42455	35.8947	12.8491	190455	68176.4			22435.7	8031.24			53.8421	19.2737	53.8421	19.2737		7.68e-05
Vanuatu	Oceania	31575.2	412	5	1	171706	34077.5	198	55.9692	107.474	27.9829	2.69026e+06	538049	35.7895	8.34385	526220	114198	843	198.844	1148.47	282.796	1184.26	291.14	7	0.951479	3033.41	292680	759
Uzbekistan	Asia	6.64074e+06	13709	70422	0.25957	1.12395e+06	372954	1217.05	365.278	496.632	145.688	1.48514e+08	4.4858e+07	257217	78555.5	1.26849e+07	4.05194e+06	142.421	42.2786	1856.11	553.245	259073	79108.7	12	48.5269	1532.37	32955400	5326
Uruguay	South America	6.82261e+06	5385	21206	1	32288.6	9240.51	36	10.9138			61006.7	17114.9	2878.68	728.172	1.28961e+06	371819	35.5789	10.5794	71.5789	21.4932	2950.26	749.666	0	17.088	17278	3449299
Micronesia	Oceania		102	91	1	871.789	235.329					190466	51371.3	1091.58	489.647			540.316	169.432	540.316	169.432	1631.89	659.079	0	0.042757	3058.43	112640
Marshall Is.	Oceania		10		1															0	0	0	0		0.0193504	3621.17	58413
N. Mariana Is.	Oceania	10405.4	81	1	0.937158	4427.74	1200.8	18.0526	6.50191	36.1053	13.0038	254602	89870	18.0526	6.536	117102	34770.8			54.1579	19.5057	72.2105	26.0417		0.0330919		56882
U.S. Virgin Is.	Central America and Caribbean	95329.2	162	6	1	4786.32	1996.19	250.158	114.805	125	54.5242	1.40648e+06	602104	160.263	70.9592	1.65431e+06	691164	286.158	125.105	661.316	294.434	821.579	365.393	0	0.0268508		106977
Guam	Oceania	14786.8	436	68	1	3800.63	990.707	54.0526	14.397	162.737	42.5596	713780	185884	825.684	224.204	130045	34037.1	179.421	45.4427	396.211	102.399	1221.89	326.604	0	0.0401015		165768
American Samoa	Oceania	1528.27	45		0.869968	1934	593.31	159.632	50.0657			629381	193920			25899	8111.68	283.842	86.4422	443.474	136.508	443.474	136.508	0	0.0100496		55465
Puerto Rico	Central America and Caribbean	1.44527e+06	5253	12179	0.990398	135676	49463	2073.37	706.552	835.316	278.678	3.57031e+07	1.22374e+07	182461	64490.2	1.8329e+07	6.33483e+06	20036.9	7028.65	22945.6	8013.88	205406	72504	4	0.761544	31651.3	3195153	260
United States of America	North America	310057920	921594	2716126	0.991728	5.28061e+07	9.64097e+06	83722	16112.1	28261.4	5339.07	6.95097e+08	1.41563e+08	7.39188e+06	1.45065e+06	8.24718e+08	1.54761e+08	284109	54252.2	396092	75703.4	7.78797e+06	1.52635e+06	178	873.325	62641	327167434
Cayman Is.	Central America and Caribbean	43599	203	1	1	73.0526	19.4978					2264.99	604.527			9787.63	2612.32	54.7895	14.6233	54.7895	14.6233	54.7895	14.6233		0.0258417		64174
Bermuda	Central America and Caribbean	1255.66	85	2	1															0	0	0	0	0	0.00631423		63968
British Virgin Is.	Central America and Caribbean	15405.3	59	3	0.984012	1674.42	741.379	71.7895	34.7812			489763	223710	143.579	69.5624	294880	134024	71.8947	33.4496	143.684	68.2308	287.263	137.793	0	0.0115458		29802
Turks and Caicos Is.	Central America and Caribbean	4124.6	76	5	0.998217															0	0	0	0	0	0.0287705	27142.2	37665
United Kingdom	Europe	31295460	363953	435354	1	2.32319e+06	467458	13275	2770.27	4107.84	902.619	1.44794e+08	3.15383e+07	1.41311e+06	276672	9.00034e+07	1.81581e+07	54607.9	12285.7	71990.8	15958.6	1.4851e+06	292630	10	33.095	42491.4	66488991	97
United Arab Emirates	Asia	1580146	13045	24402	1	125250	50208.2	987.947	379.053	541.053	240.242	1.88232e+07	7.56614e+06	56590.5	21991.4	2.31703e+06	911762	801.474	314.75	2330.47	934.046	58921	22925.5	2	6.30611	43004.9	9630959
Ukraine	Europe	25358998	88910	636531	0.936761	991296	222671	8558.74	1538.13	2691.32	499.456	9.01736e+07	1.80426e+07	516210	101318	32308488	6.67356e+06	7362.05	1501.29	18612.1	3538.88	534822	104857	7	70.5363	3095.17	44622516	767
Uganda	Africa	1.79007e+06	69945	9141	0.54518	660234	89774.1	1520.89	269.212	2160.05	347.167	1.43927e+08	2.12006e+07	21562.6	3543.54	4.8946e+06	704122	117974	18026.8	121655	18643.2	143218	22186.7	568	19.6279	643.14	42723139
Turkmenistan	Asia	20561880	1269	26230	0.772148	763924	233559	492.789	167.451	192.895	64.8998	7.41242e+06	2.31453e+06	16662.1	5306.98	3.44763e+07	1.0486e+07	457.684	153.593	1143.37	385.944	17805.5	5692.92	25	49.0776	6966.64	5850908	230
Turkey	Asia	44831648	51609	122087	0.791228	1.34553e+07	3.08455e+06	68553.8	15815.3	3861.42	922.014	1.12006e+09	2.67625e+08	1.36951e+06	318189	5.77032e+08	1.33196e+08	15184.7	3620.64	87599.9	20358	1.45711e+06	338547	159	81.25	9311.37	82319724	95847
Tunisia	Africa	1.8161e+06	5105	12469	0.927699	501007	145406	195.421	57.4276	265.526	80.2236	4.10062e+07	1.23409e+07	37733.4	10728.1	5.08964e+06	1.51507e+06	674.105	206.463	1135.05	344.114	38868.4	11072.2	0	15.3111	3446.61	11565204
Trinidad and Tobago	Central America and Caribbean	51652.2	2132	42	1	32434.7	7106.31	400.105	84.6193	310.421	66.2213	1.00718e+07	2.09962e+06	435.526	100.011	320835	70765.6	2184.84	458.827	2895.37	609.667	3330.89	709.678	10	0.419654	16843.7	1389858	178
Tonga	Oceania	10630.8	156	114	0.00698892	2406.95	723.447	71.3684	21.9196	17.8421	5.47989	165009	49958.5			60113.8	19074.6	17.8421	5.47989	107.053	32.8794	107.053	32.8794	0	0.0372513	4364.02	103197
Togo	Africa	598152	5243	1993	0.773857	140580	24565.8	165.263	36.5192	255.211	46.665	1.06345e+07	1.78352e+06	3050.26	549.841	760357	121019	1097.32	191.469	1517.79	274.653	4568.05	824.494	0	4.67422	671.841	7889094
Timor-Leste	Asia	1.59635e+06	362	329	0.69125	245310	72579.1	122.737	37.2899	2482.21	744.583	1.87058e+07	5.35428e+06	5148.16	1561.96	3.16044e+07	9.34643e+06	280.684	88.4346	2885.63	870.307	8033.79	2432.27	0	1.22944	2035.53	1267972	710
Thailand	Asia	21184912	59482	42504	0.770836	4.17422e+06	678623	44594.7	8745.08	3305	520.667	2.48477e+08	4.1177e+07	132855	22900.5	7.79112e+07	1.27423e+07	13757.9	2207.61	61657.6	11473.4	194513	34373.9	181	43.2787	7273.56	69428524	1035
Tanzania	Africa	3.53359e+06	24317	19678	0.59032	3.15084e+06	722744	1574.74	410.583	2948.42	683.798	1.89761e+08	4.64247e+07	50894.6	12167.1	1.07897e+07	2.38903e+06	308094	74591.3	312618	75685.7	363512	87852.7	83	77.0375	1050.68	56318348
Tajikistan	Asia	1.63621e+06	3014	12955	0.372937	2.50423e+06	892676	2538.11	974.124	1010	374.55	1.19657e+08	4.21136e+07	126358	44379.2	2.33842e+07	8.4749e+06	3421.68	1322.16	6969.79	2670.84	133328	47050	83	14.713	826.622	9100837	12246
Taiwan	Asia	6.6947e+06	59053	26927	0.90883	598615	182091	7010.42	2227.14	758.632	253.617	1.71542e+08	5.75844e+07	377400	118406	5.67649e+07	1.77144e+07	5143.89	1783	12912.9	4263.76	390313	122670	683	3.18084			9943
Syria	Asia	3.69779e+06	4349	62362	1	402670	132383	1325.11	476.527	1202.21	436.47	8.22157e+07	2.9311e+07	110971	37736.3	1.19872e+07	4.15612e+06	3041.21	1155.59	5568.53	2068.59	116540	39804.8	0	18.3483		16906283
Switzerland	Europe	5.15086e+06	137868	122640	1	1.07876e+06	250186	92246.3	20689.8	4977.74	1141.31	1.66155e+08	3.83935e+07	2.2382e+06	525111	8.78603e+07	2.03198e+07	30614.3	6956.1	127838	28787.2	2.36603e+06	553898	17	4.86846	82838.9	8516543	6810
Sweden	Europe	9963512	47932	59393	0.913812	534714	115521	12360.4	2821.71	180.368	40.5054	3.18675e+07	6.89647e+06	153457	34841.5	2.8641e+07	6.0917e+06	3471.74	767.007	16012.5	3629.22	169470	38470.7	2	21.7591	54112	10183175
eSwatini	Africa	166995	304	1391	0.820661	179055	53297.4	251.053	79.0573	107.895	34.1531	1.35877e+07	4.09801e+06	8458.53	2564.24	1.37289e+06	410594	286.842	88.5019	645.789	201.712	9104.32	2765.95	1	1.53645	4139.96	1136191
Suriname	South America	172084	833	364	0.97011	705129	161943	17.6842	5.45744			273975	63269.9	571.579	142.574	391595	89301.4	17.5263	6.21261	35.2105	11.67	606.789	154.244	7	11.8062	5950.21	575991
S. Sudan	Africa	2999554	796	1453	0.575738	339992	39311.9	72.4211	15.5432	36	6.83943	1.41864e+07	1.64468e+06			2.17048e+06	230842	36.2632	6.78104	144.684	29.1637	144.684	29.1637	0	50.9045		10975920
Sudan	Africa	9117224	3713	20786	0.868044	1.63383e+06	442184	37.0526	23.2581			2.88536e+07	6.09674e+06	6513.89	1811.03	6.61016e+06	1.2555e+06			37.0526	23.2581	6550.95	1834.29	11	157.022	977.274	41801533
Sri Lanka	Asia	8.38152e+06	12676	3777	0.566103	309197	93161	4250.79	1397.9	3345.63	1113.89	1.07684e+08	3.37741e+07	29865.2	9707.66	5.65384e+07	1.75529e+07	10458.1	3321.64	18054.5	5833.43	47919.7	15541.1	771	5.38957	4102.48	21670000
Spain	Europe	27685894	286305	262367	0.989256	6.53723e+06	1.39308e+06	190081	38290	6869	1301.74	4.31591e+08	8.50714e+07	2.92583e+06	552096	2.66611e+08	5.35512e+07	38306.5	7578.14	235257	47169.9	3.16109e+06	599266	21	53.6785	30523.9	46723749	1640
South Korea	Asia	11210699	70595	23731	0.638488	2.08429e+06	507838	59975	14689.6	127156	31486.7	7.67131e+08	1.94142e+08	510593	125132	1.73895e+08	4.28835e+07	71361.7	17561.3	258493	63737.6	769086	188870	127	9.76183	31362.8	51635256	227
South Africa	Africa	26163836	18093	173146	0.807048	4.87942e+06	1.07482e+06	4794.95	1014.07	1106.74	237.212	1.61065e+08	3.70596e+07	425234	92917.7	8.73596e+07	1.92151e+07	5995.84	1290.81	11897.5	2542.1	437131	95459.8	26	113.12	6374.02	57779622
Somalia	Africa	12107975	555	10	0.978006	569301	118423					6.48749e+06	1.32447e+06	18.1053	4.81773	7.85694e+06	1.63607e+06	72	21.4994	72	21.4994	90.1053	26.3171	0	38.4955	314.562	15008154
Solomon Is.	Oceania	103862	62	4	0.505259	434419	91706.3	18.0526	6.12349	54.1579	18.3705	5.93466e+06	1.26169e+06	71.4737	20.2741	1.93663e+06	411579	36.0526	12.2496	108.263	36.7435	179.737	57.0177	0	2.10775	2162.65	652858	1409
Slovakia	Europe	3.72642e+06	52552	58352	1	909499	272760	11886.6	3566.81	1374.05	402.903	7.94187e+07	2.34382e+07	602442	180151	4.1675e+07	1.22837e+07	15880.7	4692.44	29141.4	8662.15	631583	188813	0	5.92439	19546.9	5447011
Slovenia	Europe	1.41605e+06	12818	16686	1	502096	105862	1860.37	383.516	473.737	98.0628	38881538	8.2461e+06	298142	63080.6	2.35853e+07	4.96919e+06	3876.42	794.184	6210.53	1275.76	304352	64356.4	4	2.35615	26234	2067372	3755
Singapore	Asia	261254	8460	58	1	786.421	261.736	177.947	63.0683	71.3158	23.535	8.73549e+06	2.95241e+06	391.632	134.723	557301	183458	321.211	116.311	570.474	202.914	962.105	337.637		0.0392321	64581.9	5638676
Sierra Leone	Africa	2545173	2568	642	0.83916	433372	94814.8	759.684	216.376	1197.37	292.584	3.77968e+07	8.55567e+06	2986.79	821.588	1.96832e+07	4.20973e+06	3226.68	877.775	5183.74	1386.73	8170.53	2208.32	1371	5.87917	522.858	7650154
Serbia	Europe	2.37015e+06	9949	36596	0.995561	1.11814e+06	349755	5992.68	1821.32	1092.58	338.579	5.67646e+07	1.73997e+07	204119	63355.5	1.71607e+07	5.35328e+06	4098.42	1262.36	11183.7	3422.26	215303	66777.8	7	8.7463	7234	6982084	545
Senegal	Africa	6360396	5327	5517	0.700652	29279.5	6451.57			36.3158	10.5885	373220	79824.6	296.368	68.032	742971	162527	36.4211	8.79593	72.7368	19.3845	369.105	87.4165	0	16.4777	1521.95	15854360
Saudi Arabia	Asia	8.14552e+06	13457	78561	0.836732	4.73637e+06	1.33031e+06	3407.42	1001.59	2870.84	968.762	1.13039e+08	2.98566e+07	220791	59411.9	2.43014e+07	6.63301e+06	704.789	212.68	6983.05	2183.03	227774	61595	34	171.001	23219.1	33699947
SÃ£o TomÃ© and Principe	Africa	42699.3	123		0.988412	15154.5	4246.99	35.7368	9.56755	124.105	45.1416	1.45545e+06	407661			629425	179793	53.3684	14.338	213.211	69.0472	213.211	69.0472	0	0.0797397	2001.14	211028
San Marino	Europe	13115	171	93	1	1784.58	616.182	249.895	86.1252			779931	269323	1909.26	661.762	316205	109338	124.895	43.3563	374.789	129.481	2284.05	791.243	0	0.00766711		33785	10
Samoa	Oceania	25908.2	112		0.0954087	16235.8	4055.25	70.1053	20.6718	35.0526	10.3359	1.31774e+06	347069			101300	24534.6	87.8421	24.8445	193	55.8522	193	55.8522	0	0.224961	4392.47	196130
St. Vin. and Gren.	Central America and Caribbean	17318.8	78	6	1	6225.63	2230.67	35.5789	14.0567			1.42249e+06	509110	160.053	58.7788	382381	135836	283.947	103.979	319.526	118.036	479.579	176.815	9	0.0258457	7377.68	110210
Saint Lucia	Central America and Caribbean	58033.3	480	7	0.932325	10849.2	4142.51	107.526	41.8839	125.263	47.6303	3.22866e+06	1.24554e+06	125.211	47.0727	1.35921e+06	520395	1109.16	425.442	1341.95	514.956	1467.16	562.029	6	0.0459329	10315	181889
St. Kitts and Nevis	Central America and Caribbean	30445.3	191	6	0.407701	3151.42	1263.04	143.579	56.6611			670310	271523			311387	125522	35.8947	14.1653	179.474	70.8264	179.474	70.8264	0	0.0197286	19829.4	52441
Rwanda	Africa	2.369e+06	1606	1900	0.43977	358596	73419.5	2332.16	541.975	1085	218.67	1.83853e+08	3.79292e+07	40978.5	8535.19	4.42931e+07	9.32004e+06	2458.68	546.135	5875.84	1306.78	46854.3	9841.97	109	2.05442	772.968	12301939
Russia	Europe	61368848	333353	1548049	0.423215	7.43026e+07	5.65427e+06	34816.6	3593.7	7571.79	788.564	3.7177e+08	3.41483e+07	1.84103e+06	148575	1.52472e+08	1.01581e+07	9034	1120.55	51422.4	5502.81	1.89245e+06	154078	43	1138.3	11288.9	144478050	25703
Romania	Europe	6920734	40456	109914	0.997258	3.24423e+06	828102	13291	3381.54	5066.32	1290.32	1.66708e+08	4.24516e+07	705281	183505	5.56076e+07	1.41291e+07	12922.9	3341.94	31280.3	8013.79	736562	191519	15	27.3827	12301.2	19473936	10131
Qatar	Asia	819126	1813	3470	0.915712	35.7368	15.3834					231.389	97.0823			9319.1	4237.05			0	0	0	0	5	0.990744	69026.5	2781677
Portugal	Europe	6418686	55404	51772	0.991664	1.1327e+06	352993	28565.1	8804.36	5575.84	1787.57	1.06144e+08	3.40206e+07	635586	205384	7.68078e+07	2.50252e+07	13841.6	4384.37	47982.5	14976.3	683568	220360	74	9.52918	23145.7	10281762	107
Poland	Europe	27127696	198297	256416	1	648874	159978	12426.5	3107.02	931.579	233.705	88539236	2.19091e+07	444004	102256	4.27399e+07	1.05347e+07	6482	1620.26	19840.1	4960.99	463844	107217	0	41.1874	15424	37978548
Philippines	Asia	8.19368e+06	62525	48088	1	3.97577e+06	845991	14834.9	3252.68	4233.53	997.367	5.50029e+08	1.16983e+08	303565	69263.4	5.94681e+07	1.24706e+07	53532.2	11366.4	72600.6	15616.5	376166	84879.9	7646	24.0351	3102.71	106651922	28034
Peru	South America	18528396	103640	33620	1	1.30633e+07	2.90191e+06	23100.9	6599.06	7905.84	2151.35	3.71705e+08	1.05231e+08	481334	143246	3.37868e+08	9.09197e+07	792652	189927	823658	198677	1.30499e+06	341923	441	106.512	6947.26	31989256	59635
Paraguay	South America	4.11542e+06	8449	10263	1	46247.2	10937.7	53.5789	13.2553			915532	195210	6959.79	1681.05	337418	66760.9	250.474	51.8399	304.053	65.0951	7263.84	1746.14	0	35.3078	5871.47	6956071
Papua New Guinea	Oceania	3.28706e+06	540	200	0.754819	5.45675e+06	841277	337.316	63.1656	303.158	62.6092	117538680	2.02602e+07	2752.95	517.79	3.95825e+07	5.899e+06	1511.89	306.048	2152.37	431.823	4905.32	949.613	163	37.8102	2722.6	8606316	18216
Panama	North America	910796	2783	4868	0.937894	1.00439e+06	204906	524.842	138.695	415.895	110.811	3.28167e+07	8.20377e+06	52814.2	14149.2	9.91801e+06	2.34548e+06	1194.21	280.231	2134.95	529.737	54949.1	14678.9	39	6.07198	15575.1	4176873	6763
Palau	Oceania	847.464	20		0.995877	3129.42	970.461					47447.3	15243.4			6360.73	2244.84	53.5263	18.3102	53.5263	18.3102	53.5263	18.3102	0	0.0277771	17317.9	17907
Pakistan	Asia	10097015	23805	105665	0.139288	7.50728e+06	2.26903e+06	2936.21	882.496	1783.53	515.044	684478560	1.94457e+08	210337	63689	89352176	2.43043e+07	17631.5	6945.36	22351.3	8342.9	232688	72031.9	1607	81.696	1472.89	212215030	4831
Oman	Asia	2.23701e+06	4042	23391	0.863961	1.10199e+06	363751	1769.63	669.413	897.947	348.031	4.85734e+07	1.74706e+07	145575	59987.7	1.04301e+07	3.63616e+06	2000.74	776.139	4668.32	1793.58	150244	61781.2	4	26.982	16418.9	4829483
Norway	Europe	2944048	19819	49743		1.78942e+06	378955	49391.9	12102.5	2486.26	707.754	6.75928e+07	1.72792e+07	977057	225171	4.99555e+07	1.17422e+07	15989.6	3873.59	67867.8	16683.8	1.04492e+06	241854	19	8.72542	81807.2	5314336
North Korea	Asia	4.45529e+06	402	18028	0.662496	2.50104e+06	609066	71.1579	18.8245	71.0526	24.4324	3.90717e+08	9.56392e+07	186615	47967.6	6.77783e+07	1.5877e+07	35.6842	11.2005	177.895	54.4574	186793	48022.1	218	12.9648		25549819	261
Nigeria	Africa	7775054	7626	34071	0.359996	1.52985e+06	227280	324.211	59.8736	1685	340.163	2.27584e+08	3.23559e+07	42623.7	6578.14	1.05039e+07	1.5076e+06	1957.95	308.342	3967.16	708.378	46590.8	7286.51	39	74.8304	2028.18	195874740
Niger	Africa	3.85835e+06	4062	5493	0.908958	535412	148914					2.00989e+06	358161	289.053	48.6946	584071	112432	54.2632	8.78029	54.2632	8.78029	343.316	57.4749	0	100.564	411.689	22442948
Nicaragua	Central America and Caribbean	2.30851e+06	5595	2954	0.858698	1.14372e+06	269216	1264	395.354	758.842	242.584	6.28742e+07	1.87436e+07	14901.5	4851.09	2.6575e+07	6.98753e+06	5846.42	1883.23	7869.26	2521.17	22770.8	7372.26	60	10.7229	2028.9	6465513	19
New Zealand	Oceania	10078143	25544	115542	0.926861	4.98177e+06	715638	8938.47	1625.03	938.474	218.487	2.57901e+07	5.27322e+06	878801	146985	96728704	1.53304e+07	7752.68	1721.95	17629.6	3565.47	896430	150551	13	28.9996	41966	4885500	8595
Netherlands	Europe	9266162	142804	24509	1	5745.89	1174.03	519.105	117.479	231.737	46.484	3.16042e+06	663546	2467.16	557.497	1.10866e+06	222724	393.684	77.3743	1144.53	241.337	3611.68	798.833	0	4.89543	53024.1	17231017
Aruba	Central America and Caribbean	71438.8	317		0.949315	372.474	224.554	17.7368	11.1048			98486.1	59672.1			129714	78969			17.7368	11.1048	17.7368	11.1048		0.0128631		105845
CuraÃ§ao	Central America and Caribbean	142874	502	11	0.985068	1444.84	752.152	17.8421	9.36461	17.8421	9.23919	147223	80130.2			309170	163546			35.6842	18.6038	35.6842	18.6038		0.0355574		159849
Nepal	Asia	3.58817e+06	22818	7311	1	2.92219e+06	448606	5204.11	981.919	13405.4	2387.24	2.90316e+08	4.3991e+07	81025.1	13632.1	70590400	1.06372e+07	264341	48764.3	282951	52133.4	363976	65765.5	1853	13.5161	1025.8	28087871	11373
Nauru	Oceania		6	16	0.946575															0	0	0	0	0	0.0022481	9030.07	12704
Namibia	Africa	820321	2631	132054	0.927179	1.73187e+06	834795	277.632	152.966	138.947	76.2222	1.30102e+06	630790	148395	72065.8	918719	402508	226.263	105.794	642.842	334.982	149037	72400.8	0	72.1137	5931.45	2448255
Mozambique	Africa	5.4482e+06	2753	18515	0.554943	1.16992e+06	236476	250.737	72.9199	124.632	32.1424	46221336	9.69052e+06	32772.5	8461.64	7.62704e+06	1.48977e+06	499.316	132.156	874.684	237.218	33647.2	8698.85	44	67.1314	490.168	29495962
Morocco	Africa	4109401	19646	98334	0.802819	3.74077e+06	1.22363e+06	5994.26	2028.08	966.421	316.851	1.89638e+08	6.3111e+07	689902	232700	2.65426e+07	8.63641e+06	4283.63	1420.6	11244.3	3765.53	701146	236466	13	54.4179	3237.88	36029138
Montenegro	Europe	298772	6030	2852	1	350893	97541	1638.05	462.585	936.263	260.319	1.56683e+07	4.42899e+06	64788.4	17446	6.36733e+06	1.80784e+06	2540.16	692.711	5114.47	1415.62	69902.8	18861.7	0	1.50621	8760.69	622345	3475
Mongolia	Asia	5.88108e+06	5785	34222	0.383117	1.29535e+07	2.50807e+06	2814.32	577.834	453.474	91.9434	4.42293e+07	9.28096e+06	133562	26201.8	2.32332e+07	4.72371e+06	474.474	95.7685	3742.26	765.546	137304	26967.3	0	184.59	4103.7	3170208	40
Moldova	Europe	966484	7799	98236	1	136536	29593.1	4295.68	951.059	845.368	183.401	1.60594e+07	3.4511e+06	261876	56235.1	3.72987e+06	798775	1167.95	254.837	6309	1389.3	268185	57624.4	0	3.94202	3189.36	3545883
Monaco	Europe	6334.95	46	27	0.975923	372.211	130.67	204.421	71.0691	18.6316	6.70995	452056	161151	614.474	217.923	157664	55562.7	18.6316	6.70995	241.684	84.489	856.158	302.412		0.0013901		38682
Mexico	North America	69222328	79625	135133	0.800063	2.01743e+07	2.72131e+06	19606	2852.76	7043.74	1023.33	7.58043e+08	1.02578e+08	812992	92810.7	5.61662e+08	6.95805e+07	148210	24719.4	174859	28595.5	987851	121406	564	174.203	9698.08	126190788	61033
Mauritania	Africa	4.38459e+06	3753	3983	0.803259	269237	66911.7	17.9474	5.57249			1.2699e+06	277546	1318.05	650.496	1.50606e+06	333496			17.9474	5.57249	1336	656.069	0	89.6353	1218.6	4403319
Malta	Europe	145767	2562	127	1	3064.16	847.172	478.526	132.011	212.579	60.1981	2.81743e+06	782496	690.526	194.722	953361	263950	460.105	128.385	1151.21	320.594	1841.74	515.316		0.027342	30074.7	483530
Mali	Africa	5155919	15380	4681	0.942986	223089	33435.6	734.368	194.129	268.947	69.9067	1.31635e+07	3.07886e+06	2627.53	534.708	3.55552e+06	695635	15690.5	2851.74	16693.8	3115.78	19321.3	3650.48	0	106.802	901.403	19077690
Malaysia	Asia	3.32055e+06	21235	36212	0.989743	4.14242e+06	849974	7690.21	1474.67	1218.84	219.341	1.93925e+08	3.50563e+07	259198	46679.2	2.68826e+07	5.17644e+06	7226.37	1416.3	16135.4	3110.31	275333	49789.6	133	26.5659	11239	31528585	6
Malawi	Africa	1.22161e+06	16505	9344	0.316391	615229	130922	582.053	137.829	705.895	162.075	6.43752e+07	1.51671e+07	47676.9	10560	5.1533e+06	1.09947e+06	7852.63	2260.85	9140.58	2560.76	56817.5	13120.7	3	9.95789	389.398	18143315
Madagascar	Africa	6.58221e+06	5318	598	0.589689	6.02539e+06	1.47382e+06	1215.79	393.012	1109.53	341.797	2.54265e+08	6.49482e+07	11729.9	4296.18	6.3087e+07	1.60289e+07	8761.95	2432.53	11087.3	3167.34	22817.2	7463.52	101	51.0559	460.753	26262368
Macedonia	Europe	461959	3334	3074	1	532127	163145	1769.47	539.03	759.684	226.299	4.28713e+07	1.29549e+07	38815.7	12027.6	5.77103e+06	1.7438e+06	1079.26	328.025	3608.42	1093.35	42424.1	13121	6	2.7431	6083.72	2082958	2047
Luxembourg	Europe	579771	13289	7725	1	44690.4	10130	4191.47	972.053	128.211	28.9609	8.74465e+06	2.02742e+06	92191.5	20779.7	7.58995e+06	1.72818e+06	2370.05	534.449	6689.74	1535.46	98881.2	22315.2	0	0.327059	114340	607728
Lithuania	Europe	3.28157e+06	11579	60058	0.973063															0	0	0	0	0	9.1727	19089.7	2789533
Liechtenstein	Europe	8001.22	522	213	1	2871.37	750.73	1457.79	382.043			575938	149066	798	229.865	69427.7	19499	203.053	53.264	1660.84	435.307	2458.84	665.172	0	0.0164023		37910	50
Libya	Africa	10833481	9424	82283	0.751383	912717	308153	963.368	288.565	628.526	196.641	5.28368e+06	1.46644e+06	39254.8	10303.4	8.53471e+06	2.19159e+06	1766.16	567.275	3358.05	1052.48	42612.8	11355.9	0	147.893	7235.03	6678567
Liberia	Africa	1.77654e+06	24581	414	0.87276	396053	89304.7	36.7368	11.5511	109.526	26.452	1.21167e+07	2.62387e+06	217.895	61.7053	9.12521e+06	1.97599e+06	470.053	105.246	616.316	143.249	834.211	204.954	21	7.78766	674.209	4818977
Lesotho	Africa	316207	2498	5000	0.988062	577369	176432	442.368	139.074	371.211	118.3	28984142	8.87196e+06	51272.9	15172.4	5.17472e+06	1.57461e+06	2667.47	866.731	3481.05	1124.11	54753.9	16296.5	0	2.79261	1324.28	2108132
Lebanon	Asia	1.1249e+06	3775	1452	0.792218	196323	71246.5	7145.05	2427.23	1586.42	540.808	7.67534e+07	2.61466e+07	21396.2	7501.08	2.35992e+07	8.13797e+06	6806.05	2218.51	15537.5	5186.55	36933.7	12687.6	2	0.975796	8269.79	6848925
Latvia	Europe	3.46856e+06	10123	33229	0.994557	90.4737	28.2496					3391.71	1091.71			15174.5	4860.57			0	0	0	0	0	9.50481	18088.9	1926542
Laos	Asia	2678455	7337	9479	0.778809	3.89875e+06	580238	12393.4	2157.41	742.526	122.289	6.47033e+07	1.0089e+07	88718.4	13662.7	2.61079e+07	4.00215e+06	3181.42	603.731	16317.3	2883.43	105036	16546.1	27	19.5388	2567.54	7061507	1098
Kyrgyzstan	Asia	2.9965e+06	6934	10507	0.852889	4.45208e+06	1.06008e+06	4232.53	984.341	1326.84	344.962	1.03635e+08	2.54596e+07	133402	35639.8	3.4586e+07	8.42769e+06	2409.84	616.729	7969.21	1946.03	141372	37585.8	107	21.4422	1281.36	6315800	32616
Kuwait	Asia	202316	1256	14710	1	109.211	36.0841					195137	65390	54.4737	17.0077			54.4737	18.3102	54.4737	18.3102	108.947	35.3179	1	1.60777	34244	4137309
Kosovo	Europe	135723	4257	2338		200649	64970.4	1768.68	584.419	905.211	290.999	31378180	1.02814e+07	15443.6	5088.76	2.12084e+06	690575	3192.42	1042.76	5866.32	1918.18	21309.9	7006.94	0	1.19836	4281.29	1845300	243
Kiribati	Oceania		30	2	0.0381793	70.5263	45.7668													0	0	0	0		0.0759221	1625.29	115847
Kenya	Africa	8683198	38121	14481	0.711844	1.87929e+06	519882	4123.68	1347.05	2490.32	767.111	2.26553e+08	6.73054e+07	50748.6	14955.8	4.53972e+07	1.36694e+07	37791.9	12329.2	44405.9	14443.3	95154.5	29399.1	180	48.1486	1710.51	51393010
Kazakhstan	Asia	33457434	19509	184302	0.292144	4.60145e+06	1.01836e+06	2340.16	837.587	177.632	51.3292	56428014	1.67565e+07	102857	26612.1	3.22407e+07	7.19246e+06	553	199.276	3070.79	1088.19	105928	27700.2	56	329.368	9331.05	18276499	11352
Jordan	Asia	1.9284e+06	4399	5321	1	272919	82471.6	2212.84	622.693	1925.58	615.784	9.87968e+07	2.91437e+07	34941.5	10447.8	1.58616e+07	4.60039e+06	2806.11	889.63	6944.53	2128.11	41886.1	12575.9	3	8.40743	4247.77	9956011
Japan	Asia	44069708	411035	194634	1	7.30828e+06	1.15483e+06	62665.3	10656	50182.5	9626.86	1.34506e+09	2.36674e+08	2.67484e+06	455734	5.1635e+08	9.04426e+07	232431	44320.1	345279	64603	3.02012e+06	520337	344	37.8612	39286.7	126529100	78520
Jamaica	Central America and Caribbean	2.05187e+06	1252	1158	1	182808	67981.3	215.158	77.0925	162.211	58.0207	4.50688e+07	1.75415e+07	21605.9	7508.86	38058546	1.40252e+07	2984.11	1135.89	3361.47	1271.01	24967.4	8779.87	20	0.930504	5355.58	2934855	1594
Italy	Europe	27582916	343118	379545	1	5.53897e+06	961566	253517	47269.3	17340.1	3512.79	5.68194e+08	1.06313e+08	4.61438e+06	786292	3.41459e+08	6.32555e+07	66011.9	11633.7	336869	62415.8	4.95125e+06	848708	96	33.1344	34318.4	60431283	27666
Israel	Asia	1.81746e+06	14760	10816	0.981259	191664	49278.8	4777.37	1473.48	257.158	64.9446	5.79679e+07	1.63429e+07	77605.7	20516.9	1.62909e+07	4.4032e+06	2941.16	854.517	7975.68	2392.94	85581.4	22909.9	3	2.11316	41614	8883800
West Bank and Gaza	Asia	1.7962e+06	12169	345	1	111407	30171.9	7119.68	2005.05	5368.26	1502.06	62768736	1.70126e+07	5300.68	1532.33	3.27418e+07	8.88746e+06	38365.2	10589.7	50853.2	14096.8	56153.8	15629.1	4	0.603468	3198.87	4569087
Ireland	Europe	4951512	26194	161532	0.982648	369248	78516.3	2080.79	453.46	343.526	73.5114	9.80978e+06	2.01851e+06	331216	69861.2	1.2246e+07	2.55279e+06	2930.58	633.014	5354.89	1159.99	336571	71021.2	2	9.27129	78806.4	4853506
Iraq	Asia	13703550	27295	34593	0.646969	729612	253600	5763.11	2152.96	4216.21	1538.04	1.025e+08	3.63549e+07	41246.8	14300	2.32955e+07	8.0606e+06	10626.4	3864.48	20605.7	7555.48	61852.5	21855.4	0	42.2315	5878.04	38433600
Iran	Asia	14751031	47572	238855	0.248906	1.6475e+07	3.48743e+06	25576.9	5382.18	4529	971.584	933843328	1.88462e+08	1.52734e+06	302054	1.05776e+08	2.23383e+07	14760.8	3174.03	44866.7	9527.79	1.57221e+06	311582	33	156.031		81800269	79
Indonesia	Asia	37041444	50045	53822	0.522078	1.78994e+07	3.43398e+06	6659.58	1378.49	4328.53	816.045	1.74772e+09	3.718e+08	277817	57746	2.16639e+08	3.96069e+07	33417.7	6698.44	44405.8	8892.98	322223	66639	3061	151.78	3893.6	267663435	55126
India	Asia	99062504	94674	1291151	0.364736	1.72264e+07	2.03253e+06	16954.1	2459.55	14775.7	2339.3	3.2258e+09	3.97997e+08	2.09432e+06	266744	3.9762e+08	4.68291e+07	34759.8	4930.85	66489.5	9729.7	2.16081e+06	276474	11020	278.347	2015.59	1352617328	33534
Hungary	Europe	6.29309e+06	86059	196900	1	365058	119889	3973	1348	1288.26	427.094	41548845	1.41917e+07	424952	151865	1.95722e+07	6.54016e+06	4471.68	1498.92	9732.95	3274.02	434685	155139	8	11.0584	15938.8	9768785
Honduras	Central America and Caribbean	1.40879e+06	2721	1232	0.643778	1.82561e+06	461782	1265.11	298.046	991.632	240.277	1.31109e+08	3.07213e+07	17771.9	4691.02	2.27083e+07	5.7449e+06	3655.63	869.549	5912.37	1407.87	23684.3	6098.9	76	9.4976	2482.73	9587522	10320
Haiti	Central America and Caribbean	1639991	17931	4024	0.941802	437084	112476	2552.74	652.501	19847.4	4960.68	1.50355e+08	3.82483e+07	30828.5	8183.38	2.84316e+07	7.13728e+06	76262.4	19647.5	98662.6	25260.7	129491	33444.1	3754	2.29206	868.285	11123176	26
Guyana	South America	385883	1231	38	1	549221	127540	71.4211	21.0748	17.7368	8.41191	283011	82489.9	35.6842	8.62202	1.57035e+06	439247			89.1579	29.4867	124.842	38.1087	1	17.2109	4634.68	779004
Guinea-Bissau	Africa	914691	91	3	0.269369	1570.95	310.838					10785	2123.95			14561.3	2910.98			0	0	0	0	0	2.65104	777.97	1874309
Guinea	Africa	8417219	5320	1545	1	1.19545e+06	242006	419.684	114.53	437.895	107.326	5.92222e+07	1.37202e+07	17907.1	6339.91	5.39693e+07	1.15351e+07	1638.47	365.99	2496.05	587.846	20403.1	6927.75	65	20.1465	885.251	12414318
Guatemala	Central America and Caribbean	3.70546e+06	6635	2108	0.473236	1.3668e+06	306414	6912.89	1932.37	2305.58	640.379	2.71619e+08	7.00398e+07	35097.4	9244.69	7.03306e+07	1.77846e+07	8644.26	2513.73	17862.7	5086.48	52960.1	14331.2	2204	9.11494	4549.01	17247807	16157
Grenada	Central America and Caribbean	32615.8	85	944	0.939939	5638.05	1328.3	147.737	30.6591	18.4737	3.83505	1.78309e+06	403710	17209.6	5118.04	749650	163976	92.1053	19.9636	258.316	54.4577	17467.9	5172.5	1	0.0236603	10833.7	111454
Greece	Europe	8373622	52668	34900	0.939935	2.51263e+06	602220	30948.2	6700.97	2957.16	669.455	1.15035e+08	2.6302e+07	486832	112964	1.03623e+08	2.36712e+07	12259.6	2834.88	46164.9	10205.3	532997	123169	14	13.5665	20324.3	10727668	12354
Ghana	Africa	1.81636e+06	9598	11229	0.45386	356575	68305.9	2226.37	496.567	660.474	143.36	46335554	9.56262e+06	24898.2	5557.9	3.03305e+06	666325	3603.68	796.93	6490.53	1436.86	31388.7	6994.76	34	19.5721	2202.31	29767108
Germany	Europe	66369256	1330373	1039574	1	2.99359e+06	680630	185566	42876.4	13436.1	3231.28	575309088	1.31351e+08	6.86787e+06	1.54276e+06	4.21121e+08	9.58119e+07	84714.5	19072.7	283717	65180.4	7.15159e+06	1.60794e+06	6	45.903	48195.6	82927922	710
Georgia	Asia	856726	16146	13676	1	1.45368e+06	271961	12661.6	2478.81	4141.79	884.107	6.094e+07	1.167e+07	179046	33076.6	1.52023e+07	2.76279e+06	22271	4053.72	39074.4	7416.64	218120	40493.2	35	7.56305	4344.63	3731000	17216
Gambia	Africa	318366	393	1	0.610712															0	0	0	0	0	0.857667	712.452	2280102
Gabon	Africa	1.00624e+06	567	952	1	228817	36264.4	36.2632	7.61462	18.1053	4.72458	1.7735e+06	295725	2867.11	601.304	3.66446e+06	720667	17.8421	6.93832	72.2105	19.2775	2939.32	620.582	7	21.0888	8029.82	2119275
France	Europe	58311692	563644	693713		5.61504e+06	784610	221282	31928.5	8182.32	1158.87	4.42815e+08	6.36861e+07	5.20616e+06	827861	400276672	5.76805e+07	262968	41320.9	492432	74408.3	5.69859e+06	902270	18	71.4927	41463.6	66987244	6545
St-Martin	Central America and Caribbean	8409.4	83	42	1	655.789	276.718	35.4737	15.0236			548133	231291	975.421	412.714	192734	81328	106.211	45.2003	141.684	60.2238	1117.11	472.938		0.00416974		37264
Fr. Polynesia	Oceania	10738.8	695	65	0.995792	39547.4	14996.6	303.789	101.423	38.7059	28.9909	3.70698e+06	1.37549e+06	1540.16	627.101	160241	63722.6	372.579	136.328	715.074	266.742	2255.23	893.843	0	0.219168		277679
New Caledonia	Oceania	191755	1046	1145	1	189327	65152.3	509.368	174.875	17.5263	6.8343	1.9145e+06	656331	12545.2	4382.55	1.95638e+06	683579	808.789	280.892	1335.68	462.602	13880.8	4845.15	2	1.62052		284060	560
Finland	Europe	18710.8	95	246	1	18.1053	6.25295					451.564	155.955							0	0	0	0	0	0.0476611	49648.1	5518050
Fiji	Oceania	99872.1	656	393	0.696535	296692	88114.6	196.684	48.7637	89.4211	26.3213	5.86005e+06	1.72853e+06	7256.32	2236.54	1.35054e+06	401061	379.211	117.659	665.316	192.744	7921.63	2429.29	13	1.56044	6202.16	883483
Ethiopia	Africa	7246349	6471	36826	0.422898	9.61427e+06	1.06169e+06	2474.11	463.722	1773.79	309.867	1.18829e+09	1.49656e+08	329013	43758.9	6.14282e+07	7.05711e+06	9178	1437.72	13425.9	2211.3	342439	45970.2	75	92.6846	772.312	109224559
Estonia	Europe	2.41977e+06	6511	44915	0.957128	476.632	137.559	18.2632	5.38354			304493	91775.2	72.8947	22.8568	91480.9	27692			18.2632	5.38354	91.1579	28.2403	0	7.07054	22927.7	1320884
Eritrea	Africa	653045	360	408	0.819733	1.36506e+06	282573					6.33817e+07	1.298e+07	5401.68	1356.49	6.78501e+06	1.33268e+06	90.7895	18.1646	90.7895	18.1646	5492.47	1374.66	0	10.3758
Eq. Guinea	Africa	214404	146	2526	0.608703	98973.9	24183.3	18.2632	4.86304	17.9474	5.80683	3.62813e+06	890531	9487.42	2514.6	1.07211e+06	257134	18.0526	5.43112	54.2632	16.101	9541.68	2530.7	0	2.15596	10174	1308974
El Salvador	Central America and Caribbean	2.54665e+06	3035	2177	0.745598	307314	84914.4	1170.42	327.661	665.316	181.02	8.47989e+07	2.27614e+07	30588.4	8445.36	4.32825e+07	1.18193e+07	4738.16	1304.75	6573.89	1813.43	37162.3	10258.8	223	1.69785	4058.24	6420744	6011
Egypt	Africa	4521622	6360	84967	0.174652	575345	184964	205.053	73.0049	132.474	50.9459	1.28858e+07	4.83039e+06	32757.4	10986.3	3.10104e+06	1.03898e+06	183.842	77.4993	521.368	201.45	33278.8	11187.7	123	90.7975	2549.14	98423595
Ecuador	South America	7.14068e+06	29164	13984	0.978057	2.99843e+06	649089	11799.5	2909.78	11446.9	2908.99	1.72644e+08	4.72378e+07	166265	42945.3	1.03891e+08	2.86945e+07	56594.3	16652	79840.7	22470.8	246105	65416.1	73	20.6901	6344.87	17084357	25967
Dominican Rep.	Central America and Caribbean	977564	6092	7232	0.755824	560098	190535	2042.16	670.86	621	213.519	6.72854e+07	2.20523e+07	46153.4	14941.8	6.43772e+06	2.15796e+06	3310.42	1112.22	5973.58	1996.6	52127	16938.4	24	4.15373	7650.07	10627165	3537
Dominica	Central America and Caribbean	60079.4	127	4	1	14079.5	5407.62			17.5789	7.37349	1.40145e+06	539991	105.737	42.7367	1.37651e+06	529612	140.895	55.7902	158.474	63.1637	264.211	105.9	23	0.0585535	7031.71	71625	49
Djibouti	Africa	497090	188	715	0.416231	243559	60612.3	72.4211	25.6782			6.20274e+06	1.63472e+06	5987.42	1786.43	6.8486e+06	1.73164e+06	36.3158	10.9547	108.737	36.6329	6096.16	1823.06	0	1.79298	2050.2	958920
Faeroe Is.	Europe	5.7127e+06	33955	49160	0.994584	6445.21	1390.08	668.421	150.375	125.579	28.506	1.58689e+06	353671	2276.26	492.628	1.05326e+06	234677	305.947	68.2833	1099.95	247.164	3376.21	739.792	0	0.178688		48497
Denmark	Europe	10361040	105141	268407	0.925671	961096	196691	30010.2	6565.32	2004.32	434.304	1.09533e+08	2.33925e+07	2.09692e+06	468061	8.48579e+07	1.8032e+07	12754.6	2694.93	44769.1	9694.56	2.14168e+06	477755	0	6.1324	60726.5	5797446
Czechia	Europe	308375	1921	1703		26452.9	7869.72	89	26.386			2.40923e+06	716246	10281.4	3003.62	1.73979e+06	518107	178.632	54.2097	267.632	80.5957	10549.1	3084.21	0	9.82098	23078.6	10625695
Cyprus	Asia	797204	5024	2051	0.970175	98507.4	35710	854.684	316.518	124.368	47.0097	4.61024e+06	1.71418e+06	25936.7	9419.27	7.9801e+06	2.91283e+06	1034.42	382.902	2013.47	746.43	27950.2	10165.7	2	0.563019	28159.3	1189265	20
Cuba	Central America and Caribbean	5174715	13972	15519	1	436812	108473	1509.05	378.559	395.263	86.7326	4.73261e+07	1.22347e+07	32360.7	7849.05	1.85526e+07	4.57954e+06	2836.79	661.638	4741.11	1126.93	37101.8	8975.98	0	9.51007		11338138	940
Croatia	Europe	3.58693e+06	19499	20794	0.942397	802812	203692	6782.53	1606.64	1220.79	293.368	5.02368e+07	1.23746e+07	188700	45955.4	3.69506e+07	9.04163e+06	4259.26	1041.65	12262.6	2941.66	200963	48897.1	0	6.23397	14869.1	4089400	98
CÃ´te d'Ivoire	Africa	3.44006e+06	18252	9178	0.61317	412378	69257.8	429.526	86.8264	397.842	66.7577	2.98811e+07	4.85272e+06	12271.4	2176.69	3.83268e+06	628083	984.158	165.5	1811.53	319.084	14082.9	2495.77	93	26.3082	1715.53	25069229
Costa Rica	Central America and Caribbean	1.72407e+06	9066	4238	0.933043	694649	207065	2621.47	812.34	696.526	233.737	5.43846e+07	1.5315e+07	62900.7	19040.3	2.21258e+07	6.24867e+06	8280.47	2492.83	11598.5	3538.91	74499.2	22579.2	59	4.23049	12026.5	4999441	12530
Dem. Rep. Congo	Africa	12295068	9038	13659	0.343254	6.68797e+06	770865	445.895	100.638	4483.42	920.154	3.80439e+08	4.82077e+07	79096	12678.6	4.7986e+07	6.19859e+06	39677.5	6156.35	44606.8	7177.14	123703	19855.7	571	189.613	561.777	84068091
Congo	Africa	937374	1546	3469	0.922771	930514	165075	124.895	29.1107	213.526	55.8961	1.2144e+07	2.72071e+06	15979.1	3296.87	2.68062e+06	538810	302.737	75.1619	641.158	160.169	16620.2	3457.04	16	28.0807	2147.77	5244363
Comoros	Africa	26574.5	213	6	0.56409	19270.6	6642.85	17.4211	7.39606	122.368	42.9369	8.73741e+06	3.17156e+06	34.8947	10.4238	395784	141805	69.5263	28.4436	209.316	78.7766	244.211	89.2004	0	0.131067	1445.45	832322
Colombia	South America	34905708	39560	20413	0.728795	7.33683e+06	1.60409e+06	29741.1	7853.21	16661.1	3861.97	6.15584e+08	1.54708e+08	288427	72703.9	4.29657e+08	1.08075e+08	79388.7	18700.8	125791	30416	414218	103120	1434	92.5234	6651.29	49648685	71932
China	Asia	166840496	66866	1086776	0.242947	1.14935e+08	1.08944e+07	46659.8	4255.82	8923.26	1082.44	1.01147e+10	1.03811e+09	6.52538e+06	697977	1.31455e+09	1.21171e+08	22939.3	3371.18	78522.4	8709.43	6.6039e+06	706686	8620	950.981	9770.85	1392730000	59941
Macao	Asia	13497.8	62	33	1	179.789	52.7263	36	11.1555	18	5.57773	256592	76179.6	988.053	284.879	52700.3	15919.7	18	5.57773	72	22.3109	1060.05	307.19	0	0.00198672	86355.4	631636
Hong Kong	Asia	276320	7741	792	0.98229	18419	5649.05	1265.84	407.782	615.263	207.986	1.03777e+08	3.29323e+07	19475.9	6014.57	4.71215e+06	1.47714e+06	2154.74	717.894	4035.84	1333.66	23511.8	7348.23	1	0.0900072	48717.3	7451000
Chile	South America	9408080	34662	76281	1	1.10913e+07	1.87689e+06	7984.53	1790.6	4440.05	1141.92	1.90507e+08	5.01865e+07	379578	98569	8.65946e+07	1.90296e+07	14426.2	3905.95	26850.8	6838.46	406428	105407	78	76.8557	15923.4	18729160	25375
Chad	Africa	4.59287e+06	2180	1202	0.581925	1.12502e+06	335628					3.39632e+06	628027	17.7895	8.03865	2.77343e+06	640232	157.368	40.078	157.368	40.078	175.158	48.1166	0	106.83	730.245	15477751
Central African Rep.	Africa	2.10972e+06	1857	765	0.989752	200912	26262.7			397.632	65.9522	2586311	327764	161.579	31.0006	1.20248e+06	138830	559.158	81.2536	956.789	147.206	1118.37	178.206	62	50.5756	509.971	4666377
Cabo Verde	Africa	168951	669	164	1	47579.7	19954.9	427.053	181.539	569.263	248.856	8.39209e+06	3.64346e+06	3539.16	1658.49	3.02231e+06	1.2698e+06	550.526	243.444	1546.84	673.839	5086	2332.33		0.3016	3654.01	543767
Canada	North America	26276814	138231	337680	0.992903	3.97621e+07	4.30374e+06	13330.2	1837.16	2045.42	353.834	56250490	8.51111e+06	1.03856e+06	147199	6.03439e+07	7.29508e+06	10273.4	1558.43	25649	3749.42	1.06421e+06	150949	25	800.029	46210.5	37058856
Cameroon	Africa	6.17419e+06	6395	46926	1	1.82497e+06	331941	558.789	135.251	1186.58	250.352	1.21884e+08	2.26593e+07	77960.9	23035.2	2.40999e+07	4.61937e+06	5532.37	1162.92	7277.74	1548.53	85238.7	24583.7	27	37.9008	1526.88	25216237
Cambodia	Asia	4946526	9957	3002	0.745728	571411	117283	1116.58	208.849	219.632	39.7118	1.64684e+07	2.85879e+06	8328.58	2118.25	5.57605e+06	958923	714.684	132.366	2050.89	380.927	10379.5	2499.17	12	15.0395	1512.13	16249798	137
Myanmar	Asia	7392140	19519	17093	0.465588	9.1224e+06	1.20254e+06	4164.74	798.005	1267.32	216.299	3.47513e+08	5.21932e+07	61528.7	12494.4	9.40805e+07	1.3125e+07	9496.79	1843.52	14928.8	2857.82	76457.5	15352.2	1027	57.6002	1325.95	53708395	10248
Burundi	Africa	1.61719e+06	2727	793	0.867417	371529	79208.9	428.579	92.8794	20581.4	4272.89	1.61931e+08	3.5036e+07	8518.53	1624.02	2.76421e+07	6.012e+06	3385.84	717.009	24395.8	5082.78	32914.3	6706.8	21	2.20434	275.43	11175378
Burkina Faso	Africa	1.9076e+06	5432	4564	0.934506	37602.2	5472.09					2.62145e+06	425084	401.947	78.8891	360617	63503.5	90.8421	14.4732	90.8421	14.4732	492.789	93.3623	104	22.6572	731.172	19751535
Bulgaria	Europe	4.7499e+06	20076	61786	0.974706	1443158	509946	8807.32	3102.84	1646.32	567.135	80089532	2.77546e+07	493842	177112	4.16435e+07	1.4585e+07	2976.05	1074.04	13429.7	4744.02	507272	181856	19	12.3864	9272.63	7024216	2267
Brunei	Asia	50315.3	1046	708	0.877685	29197.4	8308.32	53.6842	18.6311			2.18061e+06	755009	1617.79	584.327	289797	95464.5	339.105	119.822	392.789	138.453	2010.58	722.78	5	0.460178	31627.7	428962	50
Brazil	South America	62570660	123591	782818	1	2.55799e+07	4.72902e+06	59058.3	12615.4	19166.1	4249.96	9.10075e+08	2.07328e+08	3.52317e+06	724498	291988032	5.84695e+07	96052.5	22461.8	174277	39327.1	3.69744e+06	763825	1918	706.654	8920.76	209469333	39
Botswana	Africa	949553	1417	5184	0.613703	43419.6	15892.3	227.211	92.8425	35.1053	13.8399	1.4178e+06	554760	1420.89	554.627	250789	88901.6	157.895	58.5718	420.211	165.254	1841.11	719.881	0	50.7482	8258.64	2254126
Bosnia and Herz.	Europe	875894	9048	13906	0.968789	1.17504e+06	335075	8315.53	2326.36	1089.37	323.396	8.34114e+07	2.43716e+07	234643	67400.9	1.49926e+07	4.18272e+06	6561.37	1965.14	15966.3	4614.89	250609	72015.8	11	5.82858	5951.32	3323929	7489
Bolivia	South America	9907298	23043	11226	1	6.76842e+06	1.37508e+06	14869.9	3054.96	8773.58	1892.92	1.14582e+08	2.43634e+07	168504	37710.4	6.07621e+07	1.25335e+07	93974.5	20847.7	117618	25795.6	286122	63506	60	92.1885	3548.59	11353142	7122
Bhutan	Asia	235242	852	1599	0.171434	943672	123828	547.053	89.9256	1147.37	181.884	1.96995e+07	2.68811e+06	40309.9	6393.88	5.90371e+06	809034	3478.37	619.547	5172.79	891.357	45482.7	7285.24	50	3.63311	3360.27	754394	595
Benin	Africa	1.45307e+06	4630	11945	0.820967	55890.1	7015.55	342.895	46.1193	180.421	28.1629	2.73464e+06	338796	323.263	44.0036	908736	114454	632.842	83.7385	1156.16	158.021	1479.42	202.024	0	9.56745	901.954	11485048
Belize	Central America and Caribbean	903667	801	1242	1	171532	40249	314.737	82.5583	37.2632	10.9992	2.42529e+06	580077	3803	1075.03	5.99452e+06	1.34775e+06	570.316	143.645	922.316	237.203	4725.32	1312.23	0	1.92881	5025.18	383071	24
Belgium	Europe	7.6918e+06	83659	42320	1	167270	41085.9	8939.47	2206.13	741.526	184.206	3.34557e+07	8.08767e+06	136863	33752.9	2.48e+07	6.03371e+06	6465.47	1569.22	16146.5	3959.55	153010	37712.4	1	3.9064	46556.1	11422068
Belarus	Europe	9922280	39923	252790	0.904198	289.421	54.5602					11137.4	2149.97	144.211	30.8771	31653.3	5852.67			0	0	144.211	30.8771	0	28.1303	6289.94	9485386
Barbados	Central America and Caribbean	128617	117	1	1	2400	813.885	18.2105	6.67149			744237	245563			626321	209318	90.9474	31.4863	109.158	38.1578	109.158	38.1578	1	0.0323376		286641
Bangladesh	Asia	16807028	19493	18441	0.189519	208826	39581.4	17.8421	4.43801	18.0526	4.40295	3.96333e+07	7.91992e+06	2133	509.223	7.45503e+06	1.49025e+06	253.474	51.5648	289.368	60.4058	2422.37	569.629	747	11.9996	1698.26	161356039	1146
Bahrain	Asia	31757.3	755	11	0.980654	17.8947	7.7667					5984.42	2597.37			1056.48	458.534			0	0	0	0	1	0.048743	24050.8	1569439
Bahamas	Central America and Caribbean	99671.7	352	479	1															0	0	0	0	0	1.12456		385640
Azerbaijan	Asia	1565200	8489	16742	0.711579	1.01891e+06	178895	3406.79	718.876	1988.95	419.169	7.76627e+07	1.3333e+07	101335	21843.8	1.03564e+07	1.94962e+06	4703.74	866.148	10099.5	2004.19	111435	23848	7	9.16192	4721.18	9942334	6948
Austria	Europe	10274684	160354	243523	1	1972354	314481	48308	8016.4	1800	308.754	1.3682e+08	2.30844e+07	4.01235e+06	660857	1.52259e+08	2.56025e+07	29320.1	4810.92	79428.1	13136.1	4.09178e+06	673993	11	10.0622	51512.9	8847037	6259
Australia	Oceania	59777864	103017	282939	1	1.03941e+07	2.30863e+06	15563.3	3474.31	1387.84	295.938	4.97031e+07	1.09893e+07	927847	211611	9.51766e+07	2.0325e+07	15919.3	3968.94	32870.4	7739.19	960717	219350	12	695.917	57305.3	24992369	450
Armenia	Asia	1.01365e+06	6808	19551	0.944481	549852	129163	11949.6	2958.31	2400.84	640.715	3.71478e+07	9.26796e+06	298015	70732	9.35197e+06	2.27397e+06	7138.21	1761.58	21488.7	5360.6	319503	76092.6	5	3.13411	4212.07	2951776	5178
Argentina	South America	70414104	73987	133388	1	1.04603e+07	2.12237e+06	7634.74	1291.03	2306.84	445.131	7.93989e+07	1.63376e+07	104170	19491	1.06101e+08	1.96784e+07	8475.16	1396.65	18416.7	3132.8	122587	22623.8	31	278.472	11652.6	44494502	8133
Antigua and Barb.	Central America and Caribbean	87565.4	148	3	0.0021355	1711.68	726.527	35.5789	15.7984			362694	155613	17.8421	8.15314	364994	157942	35.6842	16.3063	71.2632	32.1047	89.1053	40.2579	0	0.0366615	16864.4	96286
Angola	Africa	1.9083e+06	2827	15049	0.603906	2.52783e+06	522527	227.158	69.5567			6.6259e+07	1.62075e+07	28079.3	6590.68	3.1786e+06	694187	87.2632	23.0647	314.421	92.6215	28393.7	6683.3	20	103.587	3432.39	30809762
Andorra	Europe	4264.43	471	268	1	12418.8	3194.03	835.158	205.217	248.579	66.1885	1.84429e+06	466746	7181.26	1854.68	110645	27596.6	389.895	100.131	1473.63	371.537	8654.89	2226.21	5	0.0484984	42029.8	77006
Algeria	Africa	4811836	29627	133589	0.98409	6.02152e+06	1.45618e+06	28020.4	7437.83	4733.84	1206.17	3.78364e+08	9.61492e+07	490228	114672	19802551	4.62544e+06	26559.7	6971.61	59313.9	15615.6	549542	130288	16	213.67	4278.85	42228429
Albania	Europe	3.38988e+06	7273	7311	0.750522	664875	201982	7876.16	2324.9	890.263	267.275	4.29147e+07	1.30747e+07	123671	38343.2	7.14739e+07	2.18411e+07	3705.32	1138.98	12471.7	3731.15	136143	42074.4	5	3.04339	5253.63	2866376	6749
Afghanistan	Asia	8406632	1992	7118	0.0964243	8.98029e+06	3.72878e+06	765.789	412.641	785.947	414.339	4.60624e+08	2.05666e+08	56454.8	24854.4	1.08078e+08	4.50731e+07	4728.26	2081.36	6280	2908.34	62734.8	27762.8	692	62.5579	520.897	37172386	3249
Sint Maarten	Central America and Caribbean	17709.9	164	21	0.954195	674.053	284.769	106.421	45.0707	70.9474	30.0471	768157	324737	337	142.724	327012	138365	425.684	180.283	603.053	255.401	940.053	398.125		0.00355868		40654
